# Supplementary material for: One-step removal of hexavalent chromium in wide pH range using thiourea dioxide: the role of reactive species
Source: Royal Society of Chemistry journal article supplement (doi:10.1039/d3ra00520h), 2023-01-01
Supplement: d3ra00520h1.pdf [file d3ra00520h1.pdf]

## Supplementary Information

### One-step removal of hexavalent chromium in wide pH range using thiourea dioxide: the role of reactive species

Bin Lei<sup>a, 1</sup>, Chaoyang Wang<sup>a, 1</sup>, Ran Zhang<sup>a,b</sup>, ZhiYong Xue<sup>a,b</sup>, Feifei Chen<sup>\*a,b</sup>

<sup>a</sup>Hubei Key laboratory of Biomass Fibers and Eco-dyeing and Finishing, Wuhan Textile University, Wuhan, 430073, Hubei, china

<sup>b</sup> College of Chemistry and Chemical Engineering, Wuhan Textile University, Wuhan, 430073, Hubei, China

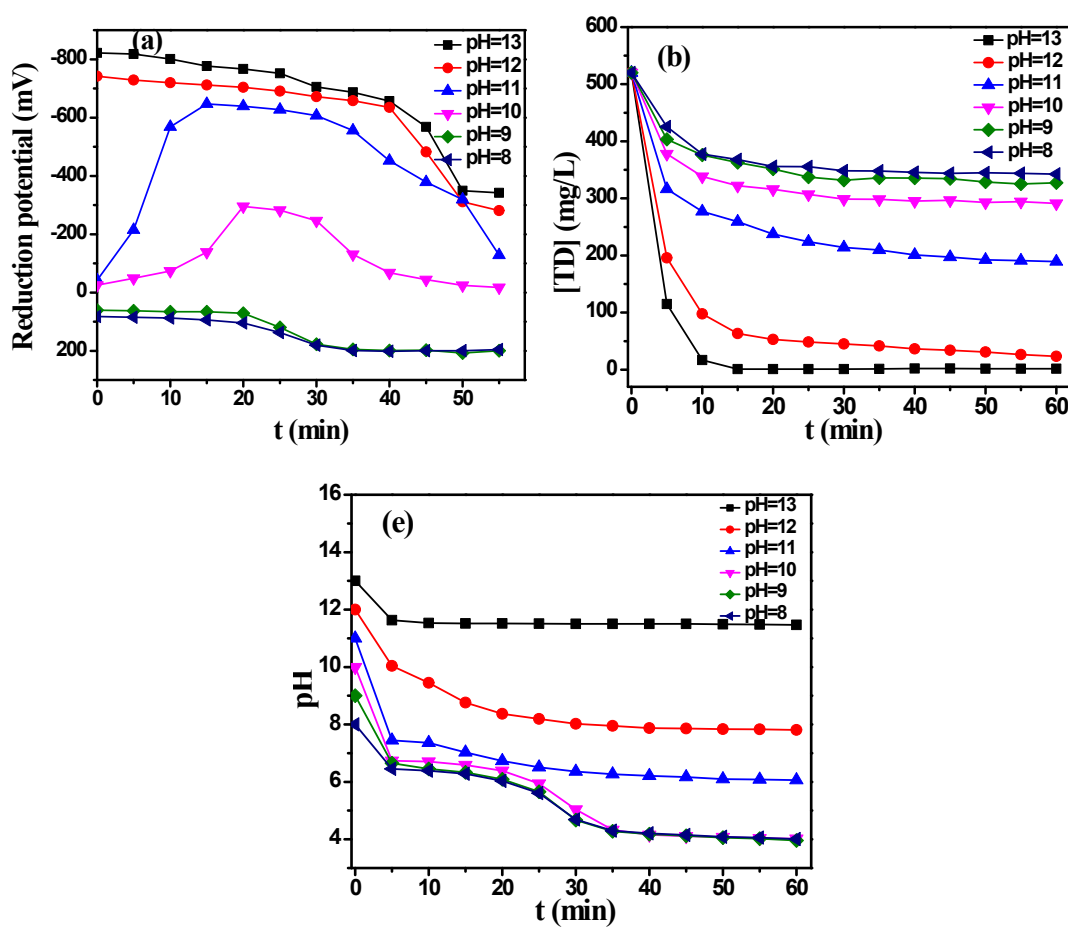

Fig.S1 Effects of the initial pH on (a) the change of reduction potential; (b) the decomposition rate of TD; (c) the change of pH. Reaction condition:  $T = 60^{\circ}\text{C}$ ,  $[\text{Cr(VI)}]/[\text{TD}] = 1:5$ .

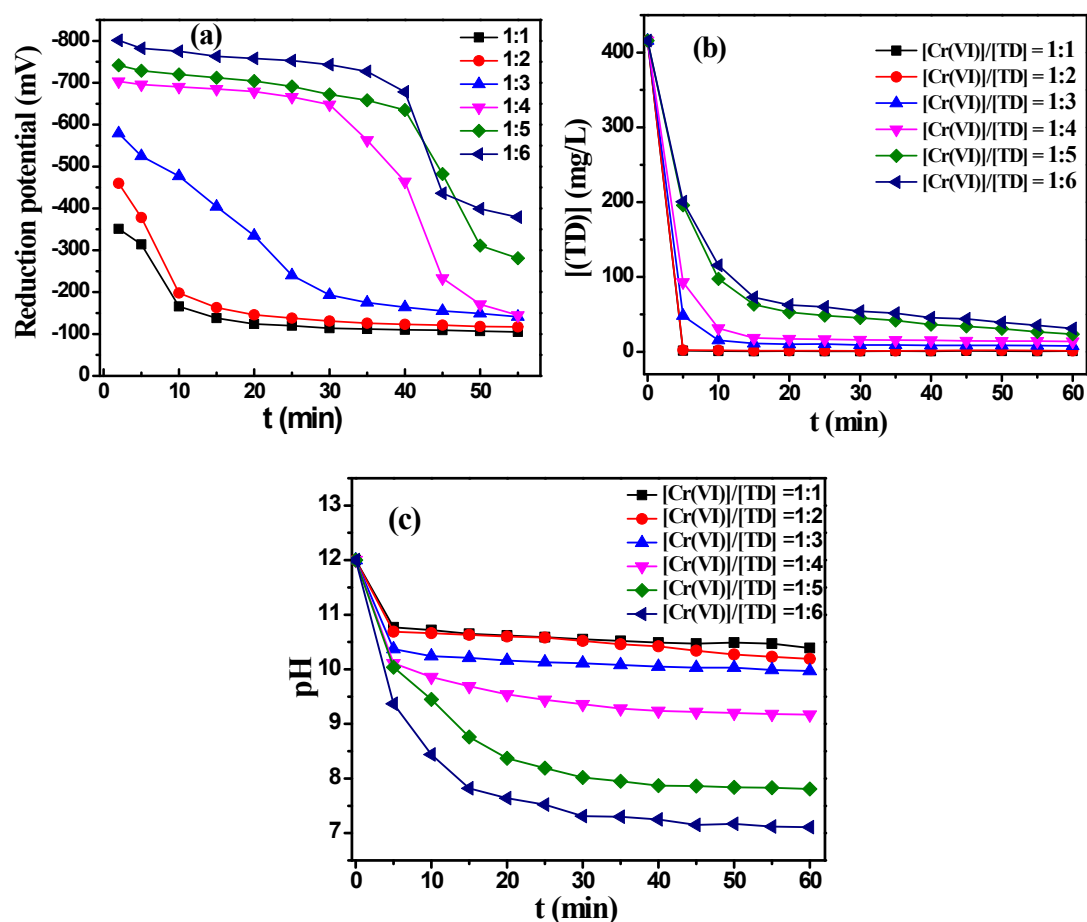

Fig.S2 Effects of TD dosage on (a) the change of reduction potential; (b) the decomposition rate of TD; (c) the change of pH. Reaction condition: T = 60°C, the initial pH value of 12, 50 mg/L Cr(VI) concentration .

Table.S1 Effect of nucleophilic reagent on the removal of Cr(VI) and total Cr

| The second component         | Residual Cr(VI) concentration<br>(mg/L) | Residual total Cr concentration<br>(mg/L) |
|------------------------------|-----------------------------------------|-------------------------------------------|
| Ethanolamine<br>(ETA)        | 0.114                                   | 0.482                                     |
| Diethanolamine<br>(DEA)      | 0.098                                   | 0.519                                     |
| Triethanolamine<br>(TEOA)    | 0.121                                   | 49.73                                     |
| Ethanol<br>(EtOH)            | 49.24                                   | 49.85                                     |
| Diethylenetriamine<br>(DETA) | 0.142                                   | 49.21                                     |
| Trimethylamine<br>(TEA)      | 0.163                                   | 0.432                                     |

Reaction conditions: the molar ratio of Cr(VI) : TD : X = 1 : 4 : 2, the initial pH value of 12, 50 mg/L

Cr(VI) concentration, temperature 60 °C, 1h.

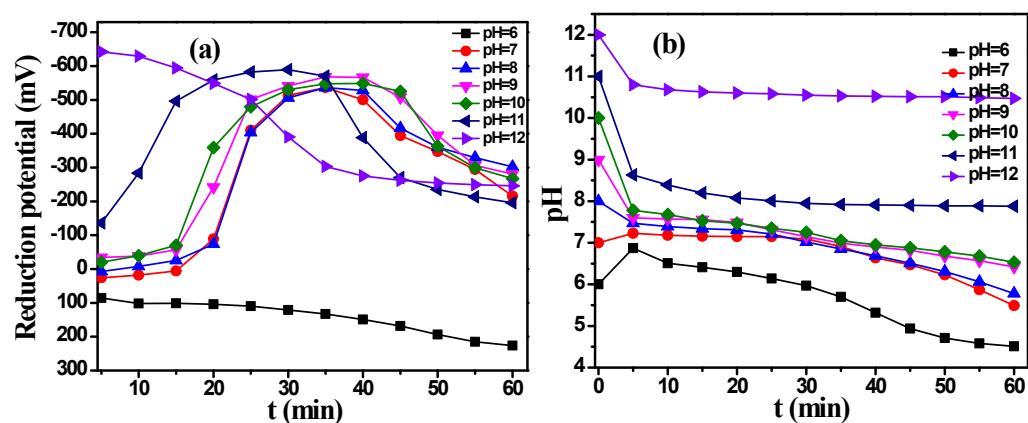

Fig.S3 Effect of the initial pH on (a) the change of reduction potential; (b) the change of pH. (Cr(VI): TD : ETA =1:3:1, [Cr(VI)] = 50 mg/L, temperature 60°C)

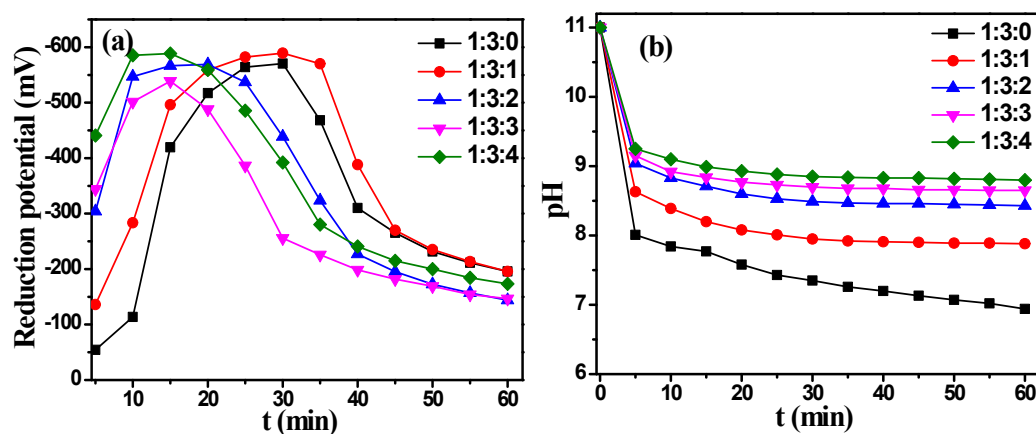

Fig.S4 Effect of the composing proportion of TD/ETA on (a) the change of reduction potential; (b) the change of pH. (T = 60°C, the initial pH value of 12, 50 mg/L Cr(VI) concentration).

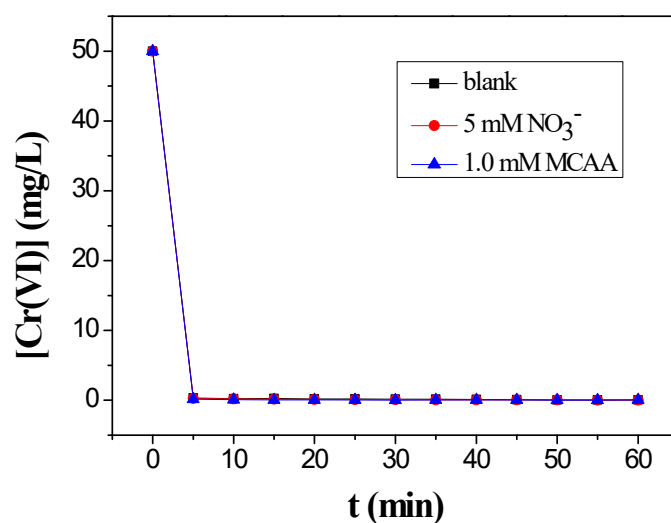

Fig.S5 Inhibitory effect of NO<sub>3</sub><sup>-</sup> and MCAA on the removal of Cr(VI). (Cr(VI): TD : ETA =1:3:1, [Cr(VI)] = 50 mg/L, temperature 60°C)
